# Supplementary material
Source: HighWire-hosted journal article supplement (https://jmg.bmj.com/highwire/filestream/189603/field_highwire_adjunct_files/0/jmg-2023-109579supp001_data_supplement.pdf)

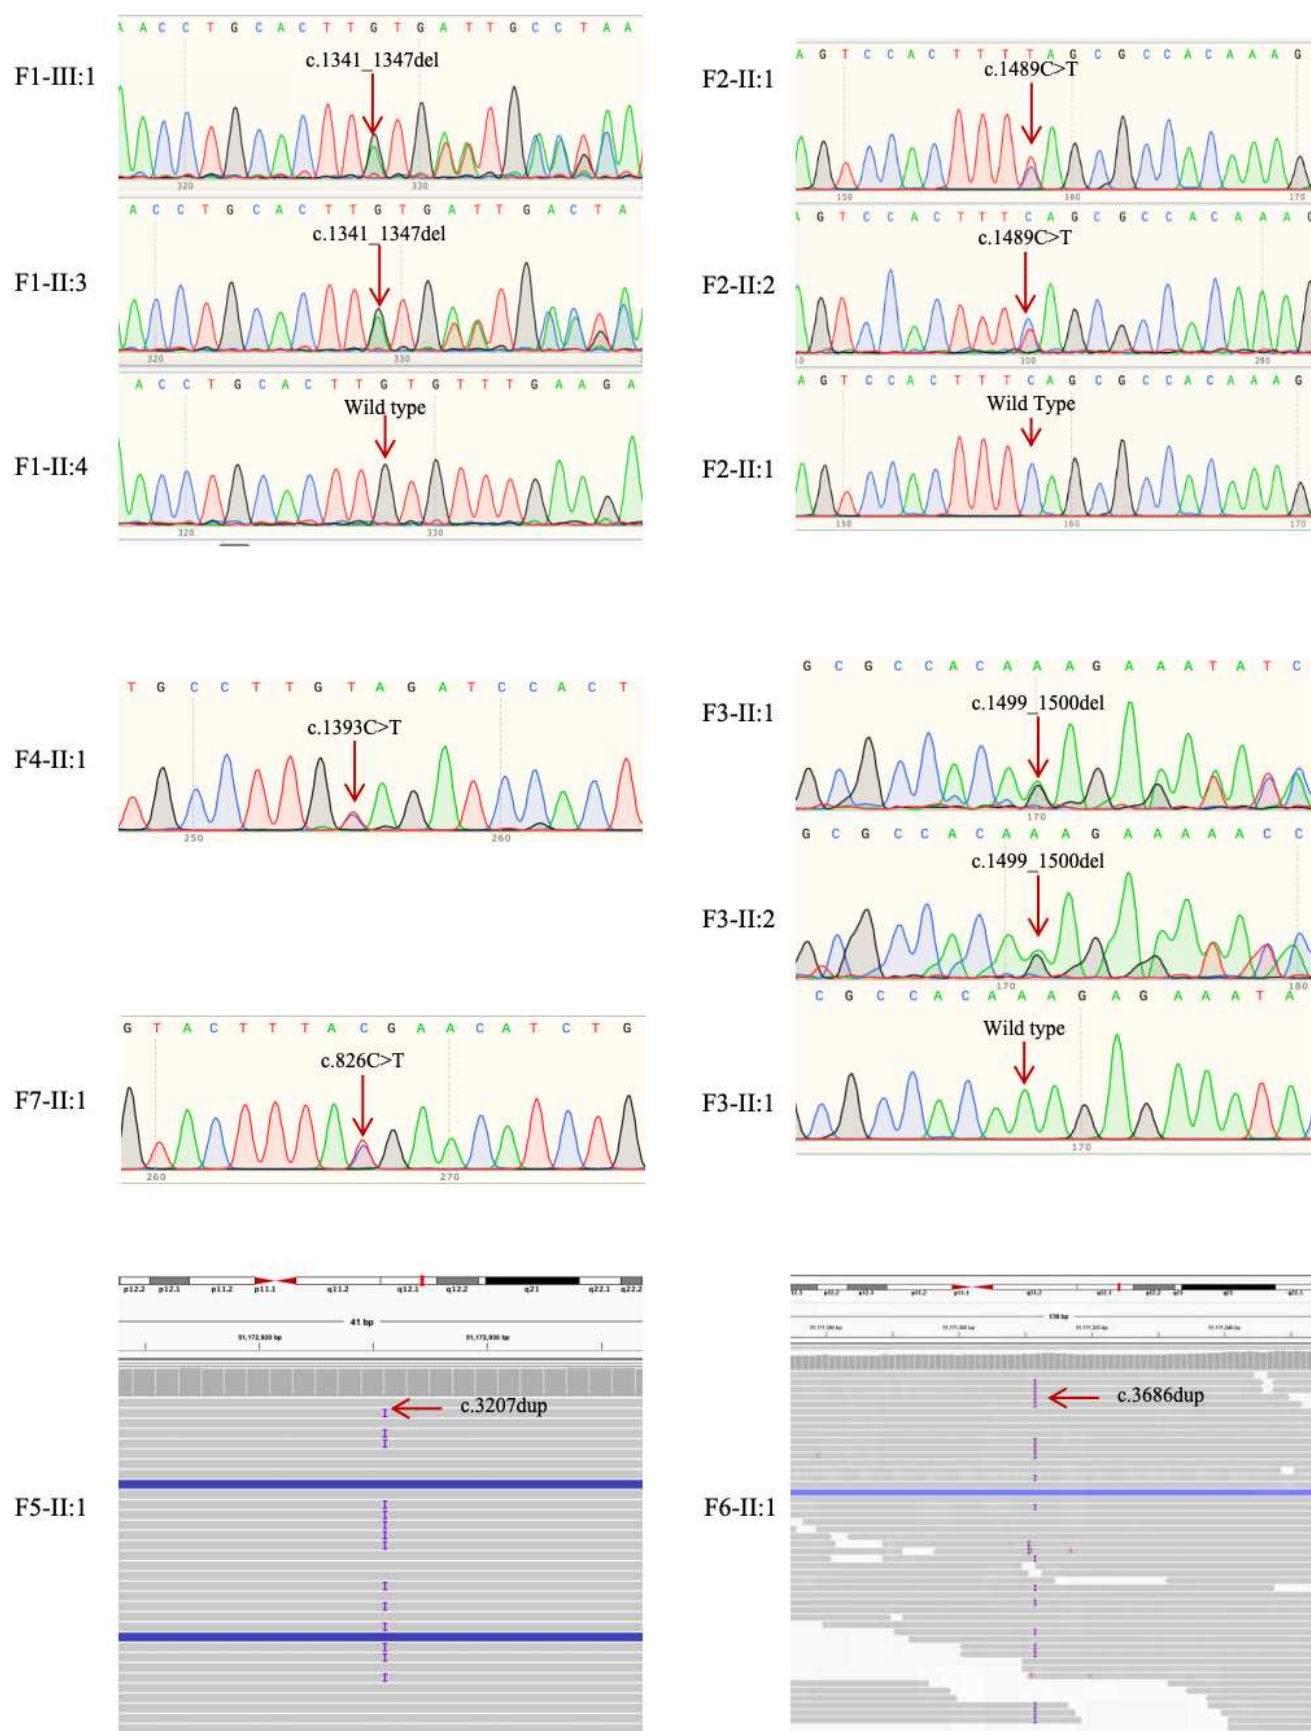

Supplementary Figure 1. Sanger sequencing data of Family 1-4 and 7 and bam files of Family 5-6.

Supplement: jmg-2023-109579supp001_data_supplement.pdf [file jmg-2023-109579supp001_data_supplement.pdf]
